# Supplementary material for: p27-V109G Polymorphism Is Not Associated with the Risk of Prostate Cancer: A Case-Control Study of Han Chinese Men in Central China
Source: Hindawi journal article supplement (doi:10.1155/2018/1418609), 2018-01-01
Supplement: f1 [file 1418609.f1.pdf]

## Supplementary Information

### ***P27-V109G Polymorphism Is Not Associated with the Risk of Prostate Cancer: A Case-Control Study of Han Chinese Men in Central China***

Meng Zhang<sup>#</sup>, Qianjun Liang<sup>#</sup>, Ligang Zhang, Zongyao Hao, Jun Zhou, Li Zhang, Song Fan, Chaozhao Liang\*

1. Department of Urology, The First Affiliated Hospital of Anhui Medical University, Hefei, China
2. Institute of Urology, Anhui Medical University, Hefei, China
3. Graduate School of Anhui Medical University, Hefei, China

<sup>#</sup> These authors contributed equally to the work.

#### **\* Correspondence:**

Name: Chaozhao Liang;

<sup>1</sup> Department of Urology, the First Affiliated Hospital of Anhui Medical University, Hefei 230022, China;

<sup>2</sup> Institute of Urology, Anhui Medical University, Hefei 230022, China.

Tel.: +86 55162923440

**Email address:** [liang\\_chaozhao@ahmu.edu.cn](mailto:liang_chaozhao@ahmu.edu.cn)

#### **Online Supplementary Material**

Table S1-S3, and Figure S1-S2

## Supplementary Information

**Supplementary table 1.** Main characteristics of all studies included in the meta-Analysis

| <b>Author</b>           | <b>Year</b> | <b>Ethnicity</b> | <b>Cancer Type</b>         | <b>No. of subjects<br/>cases/controls</b> | <b>Genotype Frequency<br/>TT/TG/GG, control-case</b> | <b>Genotyping<br/>method</b> |
|-------------------------|-------------|------------------|----------------------------|-------------------------------------------|------------------------------------------------------|------------------------------|
| Kibel <i>et al.</i>     | 2003        | Caucasian        | Prostate cancer            | 96/105                                    | 67/24/5-57/38/10                                     | PCR                          |
| Huang <i>et al.</i>     | 2007        | Asian            | Prostate cancer            | 190/292                                   | 183/7/0-280/12/0                                     | PCR-RFLP                     |
| Han <i>et al.</i>       | 2015        | Asian            | Prostate cancer            | 70/70                                     | 66/2/2-60/1/9                                        | PCR-RFLP                     |
| Ma <i>et al.</i>        | 2006        | Asian            | Ovarian cancer             | 164/248                                   | 153/6/5-217/29/2                                     | PCR-RFLP                     |
| Gayther <i>et al.</i>   | 2007        | Caucasian        | Ovarian cancer             | 1495/2584                                 | 895/524/76-1375/934/175                              | TaqMan                       |
| Yu <i>et al.</i>        | 2008        | Asian            | Ovarian cancer             | 100/95                                    | 92/5/3-95/0/0                                        | PCR-RFLP                     |
| Jin <i>et al.</i>       | 2008        | Asian            | Ovarian cancer             | 234/284                                   | 219/12/3-251/31/2                                    | PCR-RFLP                     |
| Mohamed <i>et al.</i>   | 2012        | African          | Ovarian cancer             | 100/100                                   | 16/33/51-25/40/35                                    | PCR-RFLP                     |
| Li <i>et al.</i>        | 2004        | Caucasian        | Oral squamous cell cancer  | 713/1224                                  | 422/241/50-718/440/66                                | PCR-RFLP                     |
| Li <i>et al.</i>        | 2007        | Asian            | Non-small cell lung cancer | 202/265                                   | 190/12/0-249/15/1                                    | PCR-RFLP                     |
| Li <i>et al.</i>        | 2010        | Asian            | Non-small cell lung cancer | 110/124                                   | 102/7/1-120/4/0                                      | PCR-RFLP                     |
| Francisco <i>et al.</i> | 2013        | Mixed            | Melanoma                   | 184/173                                   | 99/75/10-66/86/21                                    | PCR-RFLP                     |
| Daniela <i>et al.</i>   | 2011        | Caucasian        | Medullary thyroid cancer   | 84/90                                     | 45/38/1-56/28/6                                      | PCR-RFLP                     |
| Liu <i>et al.</i>       | 2013        | Asian            | Hepatocellular cancer      | 476/547                                   | 438/38/0-490/36/21                                   | PCR-RFLP                     |
| Guo <i>et al.</i>       | 2006        | Asian            | Esophageal cancer          | 299/438                                   | 281/17/1-380/53/5                                    | PCR-RFLP                     |
| Ma <i>et al.</i>        | 2008        | Asian            | Esophageal cancer          | 202/265                                   | 190/12/0-249/15/1                                    | PCR-RFLP                     |
| Sekiya <i>et al.</i>    | 2014        | Caucasian        | Endocrine tumors           | 517/885                                   | 223/235/59-363/406/116                               | Sequencing                   |
| Guo <i>et al.</i>       | 2006        | Asian            | Esophageal cancer          | 256/438                                   | 238/16/2-380/53/5                                    | PCR-RFLP                     |
| Ferrand <i>et al.</i>   | 1996        | Caucasian        | Breast cancer              | 30/80                                     | 22/7/1-49/21/10                                      | PCR-RFLP                     |

### Supplementary Information

|                          |      |           |               |           |                           |          |
|--------------------------|------|-----------|---------------|-----------|---------------------------|----------|
| MaH <i>et al.</i>        | 2006 | Asian     | Breast cancer | 368/467   | 345/23/0-442/25/0         | PCR-RFLP |
| Onay <i>et al.</i>       | 2006 | Asian     | Breast cancer | 398/372   | 256/125/17-235/122/15     | TaqMan   |
| Naidu <i>et al.</i>      | 2007 | Asian     | Breast cancer | 230/200   | 171/46/13-159/34/7        | PCR-RFLP |
| Figueiredo <i>et al.</i> | 2007 | Asian     | Breast cancer | 1087/677  | 668/366/53-405/243/29     | TaqMan   |
| Driver <i>et al.</i>     | 2008 | Caucasian | Breast cancer | 2022/2179 | 1187/732/103-1267/796/116 | TaqMan   |

---

PCR-RFLP: polymerase chain reaction–restriction fragment length polymorphism; mixed: more than two ethnicities.

Supplementary Information

**Supplementary table 2.** The overall analyses of *p27-V109G* polymorphism and cancer risk.

| Parameters                 |    | G vs. T             |          |                      | GG vs. TT           |          |                      | GT vs. TT           |          |                      |
|----------------------------|----|---------------------|----------|----------------------|---------------------|----------|----------------------|---------------------|----------|----------------------|
| Variables                  | N  | OR(95%CI)           | <i>P</i> | <i>P<sub>h</sub></i> | OR(95%CI)           | <i>P</i> | <i>P<sub>h</sub></i> | OR(95%CI)           | <i>P</i> | <i>P<sub>h</sub></i> |
| All cancer                 | 24 | 0.859 (0.764-0.967) | 0.012    | 0.000                | 0.862 (0.659-1.128) | 0.279    | 0.002                | 0.881 (0.783-0.991) | 0.290    | 0.031                |
| PCa                        | 3  | 0.537 (0.365-0.789) | 0.002    | 0.238                | 0.554 (0.351-0.876) | 0.012    | 0.474                | 0.659 (0.397-1.092) | 0.106    | 0.478                |
| Breast cancer              | 6  | 0.985 (0.911-1.066) | 0.709    | 0.344                | 0.998 (0.803-1.239) | 0.984    | 0.468                | 0.973 (0.882-1.073) | 0.583    | 0.824                |
| Ovarian cancer             | 5  | 0.876 (0.793-0.967) | 0.943    | 0.001                | 1.696 (0.678-4.243) | 0.259    | 0.005                | 0.721 (0.409-1.271) | 0.258    | 0.012                |
| Esophageal cancer          | 2  | 0.596 (0.279-1.274) | 0.182    | 0.094                | 0.309 (0.052-1.835) | 0.197    | 0.808                | 0.646 (0.273-1.530) | 0.321    | 0.073                |
| Non-small cell lung cancer | 2  | 1.262 (0.681-2.339) | 0.459    | 0.149                | 1.242 (0.171-8.993) | 0.830    | 0.367                | 1.273 (0.661-2.453) | 0.470    | 0.371                |
| Others                     | 6  | 0.776 (0.614-0.980) | 0.033    | 0.001                | 0.579 (0.303-1.106) | 0.098    | 0.002                | 0.887 (0.692-1.137) | 0.344    | 0.018                |
| Ethnicity                  |    |                     |          |                      |                     |          |                      |                     |          |                      |
| Asian                      | 14 | 0.816 (0.643-1.034) | 0.092    | 0.000                | 0.852 (0.493-1.473) | 0.566    | 0.078                | 0.891 (0.719-1.104) | 0.290    | 0.031                |
| Caucasian                  | 7  | 0.911 (0.818-1.015) | 0.090    | 0.043                | 0.824 (0.629-1.080) | 0.161    | 0.051                | 0.926 (0.857-1.001) | 0.053    | 0.199                |
| Mixed                      | 3  | 0.901 (0.443-1.833) | 0.774    | 0.000                | 1.263 (0.272-5.861) | 0.765    | 0.001                | 0.617 (0.306-1.244) | 0.177    | 0.047                |
| (GT+GG) vs. TT             |    |                     |          |                      |                     |          |                      |                     |          |                      |
| Variables                  | N  | OR(95%CI)           | <i>P</i> | <i>P<sub>h</sub></i> | GG vs. (GT+TT)      |          |                      |                     |          |                      |
| All cancer                 | 24 | 0.829 (0.729-0.942) | 0.004    | 0.000                | 0.908 (0.707-1.168) | 0.454    | 0.003                |                     |          |                      |
| PCa                        | 3  | 0.554 (0.351-0.876) | 0.012    | 0.474                | 0.363 (0.149-0.886) | 0.026    | 0.325                |                     |          |                      |
| Breast cancer              | 6  | 0.919 (0.743-1.137) | 0.435    | 0.011                | 1.010 (0.815-1.251) | 0.928    | 0.508                |                     |          |                      |
| Ovarian cancer             | 5  | 0.859 (0.523-1.412) | 0.549    | 0.013                | 1.611 (0.717-3.620) | 0.249    | 0.004                |                     |          |                      |
| Esophageal cancer          | 2  | 0.614 (0.268-1.409) | 0.250    | 0.078                | 0.326 (0.055-1.934) | 0.217    | 0.837                |                     |          |                      |
| Non-small cell lung cancer | 2  | 1.272 (0.671-2.414) | 0.461    | 0.238                | 1.220 (0.168-8.868) | 0.844    | 0.374                |                     |          |                      |

Supplementary Information

|           |    |                     |       |       |                     |       |       |
|-----------|----|---------------------|-------|-------|---------------------|-------|-------|
| Others    | 6  | 0.810 (0.638-1.029) | 0.084 | 0.015 | 0.637 (0.347-1.166) | 0.144 | 0.004 |
| Ethnicity |    |                     |       |       |                     |       |       |
| Asian     | 14 | 0.803 (0.640-1.007) | 0.057 | 0.005 | 0.867 (0.504-1.491) | 0.606 | 0.081 |
| Caucasian | 7  | 0.913 (0.847-0.983) | 0.016 | 0.104 | 0.859 (0.667-1.107) | 0.240 | 0.066 |
| Mixed     | 3  | 0.757 (0.360-1.594) | 0.464 | 0.011 | 1.307 (0.377-4.529) | 0.673 | 0.003 |

---

N= number of studies involved; OR= Odd ratio, 95%CI= 95%confidence interval;  $P$  = $P$ -Value;  $P_h$  =  $P$ -value of Q-test for heterogeneity test.

Supplementary Information

**Supplementary table 3.** Details of the sensitivity analyses for the *p27-VI09G* polymorphism and cancer risk

| Study Omitted           | G vs. T  |             | GG vs. TT |             | GT vs. TT |             | (GT+GG) vs. TT |             | GG vs. (GT+TT) |             |
|-------------------------|----------|-------------|-----------|-------------|-----------|-------------|----------------|-------------|----------------|-------------|
|                         | Estimate | 95%CI       | Estimate  | 95%CI       | Estimate  | 95%CI       | Estimate       | 95%CI       | Estimate       | 95%CI       |
| Kibel <i>et al.</i>     | 0.874    | 0.776-0.984 | 0.888     | 0.676-1.167 | 0.894     | 0.795-1.001 | 0.843          | 0.741-0.958 | 0.928          | 0.717-1.200 |
| Huang <i>et al.</i>     | 0.858    | 0.761-0.967 | 0.862     | 0.659-1.128 | 0.880     | 0.780-0.993 | 0.827          | 0.726-0.943 | 0.908          | 0.707-1.168 |
| Han <i>et al.</i>       | 0.873    | 0.778-0.980 | 0.896     | 0.688-1.166 | 0.879     | 0.780-0.990 | 0.836          | 0.735-0.950 | 0.942          | 0.737-1.204 |
| Ma <i>et al.</i>        | 0.863    | 0.765-0.973 | 0.838     | 0.642-1.094 | 0.898     | 0.803-1.003 | 0.839          | 0.738-0.955 | 0.886          | 0.691-1.345 |
| Gayther <i>et al.</i>   | 0.856    | 0.750-0.978 | 0.887     | 0.660-1.191 | 0.879     | 0.768-1.007 | 0.826          | 0.714-0.956 | 0.935          | 0.710-1.232 |
| Yu <i>et al.</i>        | 0.856    | 0.763-0.961 | 0.850     | 0.651-1.109 | 0.878     | 0.783-0.986 | 0.825          | 0.728-0.935 | 0.897          | 0.699-1.152 |
| Jin <i>et al.</i>       | 0.868    | 0.770-0.978 | 0.850     | 0.647-1.117 | 0.897     | 0.800-1.006 | 0.841          | 0.739-0.956 | 0.896          | 0.694-1.157 |
| Mohamed <i>et al.</i>   | 0.836    | 0.746-0.938 | 0.813     | 0.626-1.057 | 0.874     | 0.775-0.985 | 0.814          | 0.717-0.924 | 0.857          | 0.671-1.095 |
| Li <i>et al.</i>        | 0.843    | 0.743-0.958 | 0.822     | 0.618-1.093 | 0.873     | 0.766-0.995 | 0.815          | 0.710-0.936 | 0.868          | 0.665-1.133 |
| Li <i>et al.</i>        | 0.857    | 0.760-0.967 | 0.865     | 0.659-1.136 | 0.877     | 0.777-0.990 | 0.825          | 0.724-0.940 | 0.911          | 0.706-1.176 |
| Li <i>et al.</i>        | 0.852    | 0.758-0.957 | 0.854     | 0.652-1.119 | 0.875     | 0.778-0.984 | 0.821          | 0.723-0.932 | 0.901          | 0.699-1.160 |
| Francisco <i>et al.</i> | 0.880    | 0.783-0.990 | 0.924     | 0.712-1.200 | 0.900     | 0.801-1.012 | 0.849          | 0.747-0.964 | 0.958          | 0.745-1.230 |
| Daniela <i>et al.</i>   | 0.851    | 0.754-0.961 | 0.881     | 0.674-1.151 | 0.867     | 0.772-0.973 | 0.815          | 0.716-0.927 | 0.930          | 0.726-1.192 |
| Liu <i>et al.</i>       | 0.880    | 0.783-0.989 | 0.893     | 0.695-1.147 | 0.869     | 0.770-0.981 | 0.832          | 0.729-0.951 | 0.939          | 0.745-1.184 |
| Guo <i>et al.</i>       | 0.882    | 0.787-0.989 | 0.877     | 0.669-1.148 | 0.904     | 0.809-1.010 | 0.851          | 0.751-0.963 | 0.922          | 0.716-1.187 |
| Ma <i>et al.</i>        | 0.857    | 0.760-0.967 | 0.865     | 0.659-1.136 | 0.877     | 0.777-0.990 | 0.825          | 0.724-0.941 | 0.911          | 0.706-1.176 |
| Sekiya <i>et al.</i>    | 0.851    | 0.748-0.968 | 0.857     | 0.633-1.162 | 0.873     | 0.768-0.993 | 0.820          | 0.714-0.942 | 0.905          | 0.680-1.204 |
| Guo <i>et al.</i>       | 0.875    | 0.778-0.984 | 0.867     | 0.659-1.141 | 0.900     | 0.802-1.009 | 0.845          | 0.743-0.960 | 0.912          | 0.705-1.180 |
| Ferrand <i>et al.</i>   | 0.868    | 0.771-0.977 | 0.880     | 0.673-1.151 | 0.882     | 0.782-0.995 | 0.834          | 0.732-0.949 | 0.925          | 0.720-1.189 |

Supplementary Information

|                          |       |             |       |             |       |             |       |             |       |             |
|--------------------------|-------|-------------|-------|-------------|-------|-------------|-------|-------------|-------|-------------|
| Ma H <i>et al.</i>       | 0.851 | 0.754-0.960 | 0.862 | 0.659-1.128 | 0.872 | 0.773-0.984 | 0.819 | 0.718-0.933 | 0.908 | 0.707-1.168 |
| Onay <i>et al.</i>       | 0.850 | 0.750-0.963 | 0.847 | 0.637-1.127 | 0.875 | 0.771-0.993 | 0.820 | 0.716-0.939 | 0.895 | 0.685-1.169 |
| Naidu <i>et al.</i>      | 0.841 | 0.747-0.948 | 0.831 | 0.632-1.094 | 0.868 | 0.770-0.979 | 0.811 | 0.712-0.922 | 0.882 | 0.681-1.141 |
| Figueiredo <i>et al.</i> | 0.848 | 0.746-0.964 | 0.836 | 0.624-1.119 | 0.875 | 0.768-0.997 | 0.844 | 0.739-0.964 | 0.882 | 0.671-1.159 |
| Driver <i>et al.</i>     | 0.844 | 0.738-0.965 | 0.840 | 0.614-1.148 | 0.866 | 0.758-0.991 | 0.814 | 0.707-0.937 | 0.889 | 0.662-1.192 |

---

95%CI= 95% confidence interval

Supplementary Information

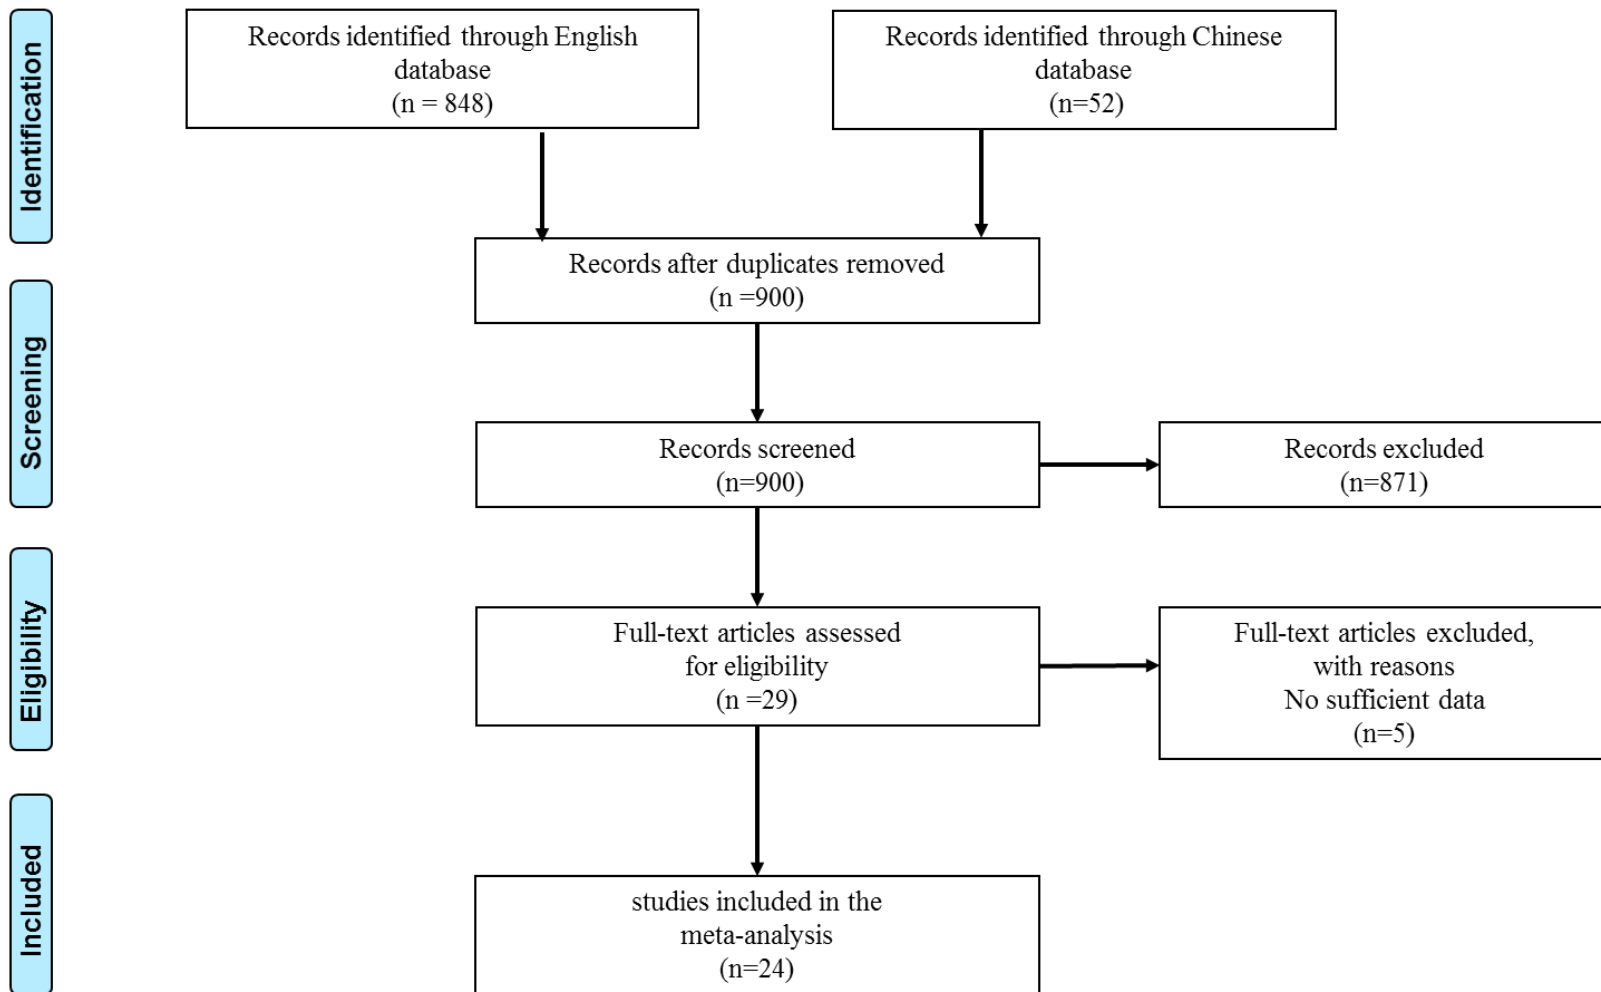

Supplementary figure 1. Flow chart shows study selection process.



Supplementary Information

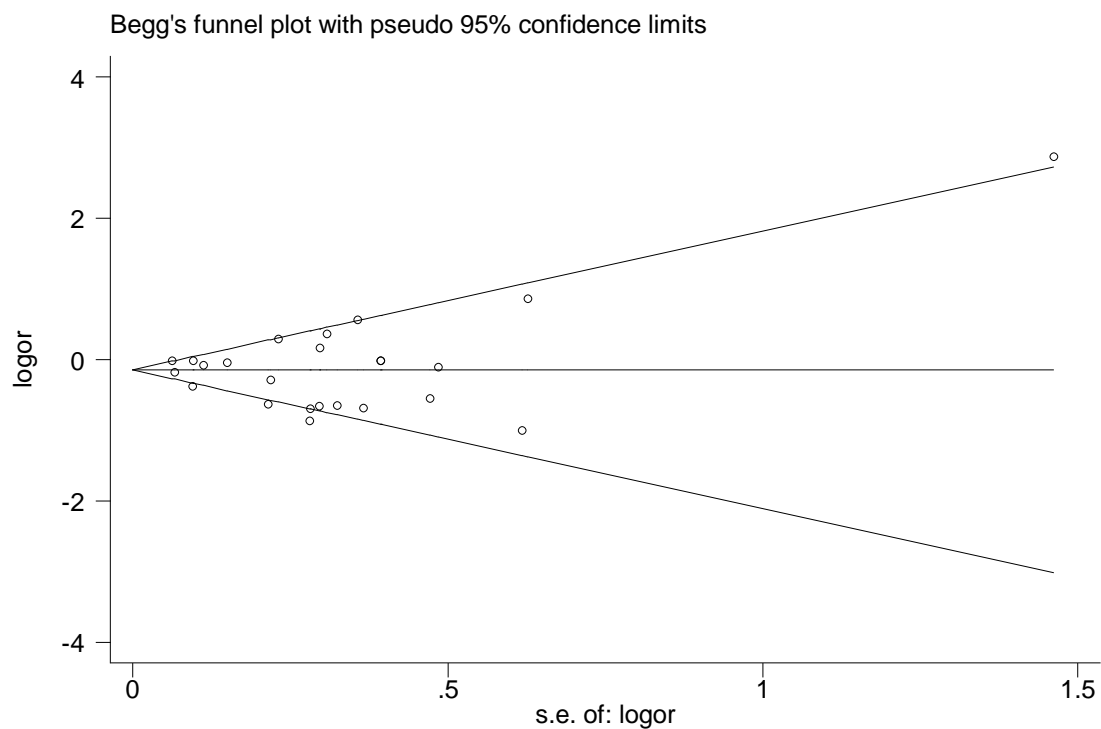

**Supplementary figure 2.** Funnel plot of publication bias analysis for the associations between the *p27-V109G* polymorphism and cancer risk (GT+GG vs. TT).
